# Supplementary material for: Change in fetal behavior in response to vibroacoustic stimulation
Source: publisher site journal article supplement (doi:10.1515/jpm-2018-0344), 2019-05-15
Supplement: Supplementary file 2 [file e_pdf.pdf › Supplement/e_pdf.pdf]

特定保守管理医療機器 胎児振動刺激装置 T R - 3 0

【警告】

本器の使用は、分娩監視装置や超音波画像診断装置等により、必ず胎児状態を監視すること。[胎児の状態によっては不要な刺激を与えます]

【禁忌・禁止】

併用禁忌医療用具

- ①可燃性麻酔ガス雰囲気内では使用しないこと。[爆発又は火災を起こすことがあります]
- ②X線室、MRI室、画像処理室内では使用しないこと。  
[正常に使用できる保証がありません]

【形状・構造及び原理等】 \*

1. 構成

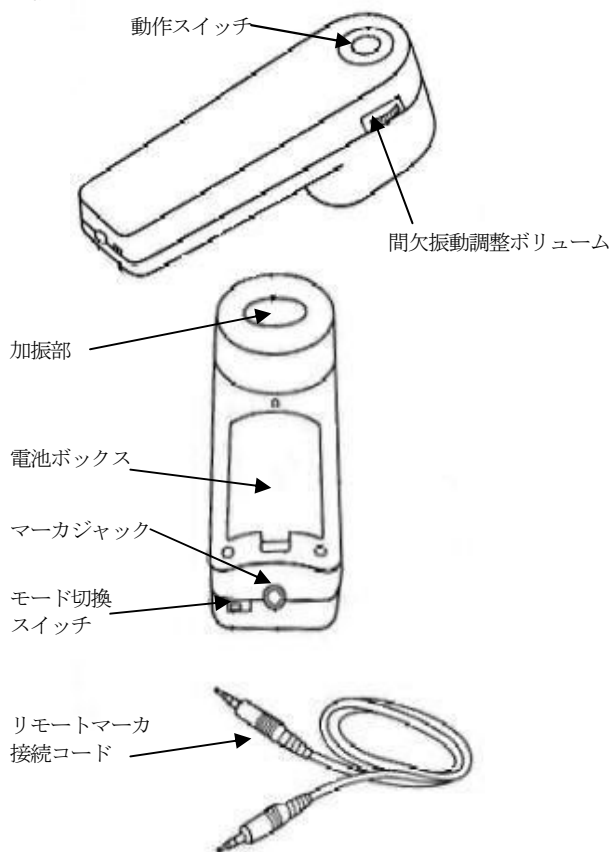

2. 電源定格

定格電圧：直流3～2.4V（単三形乾電池2本使用）

電源入力：3VA以下

電撃保護：内部電源機器 B形装着部

3. 体に接触する部分の原材料

加振部及びケース全体：ABS樹脂

4. 外形寸法／質量

145 (W) × 45 (D) × 50 (H)  $\pm 10$  mm / 110  $\pm 30$  g (電池なし)

5. 原理 \*

動作スイッチを押すと、内部のIC回路等が働き、動作時間切替スイッチが3秒間モードの時は約3秒間動作します。連続モードの時は動作スイッチを押している間中動作します。

動作スイッチを押すのを止めると、動作は停止します。動作中は電源が間欠的に内蔵モータに供給されて偏心おもりが回転し、これに伴い加振部が数十ヘルツ程度の周波数で振動します。

6. EMC \*\*

本製品はEMC規格 JIS T 0601-1-2:2002 に適合しています。 \*\*

【使用目的、効能又は効果】 \*

1. 使用目的

母体腹壁から胎児を音響（振動）的に刺激するための装置です。この装置は胎児の音響刺激反応を分娩監視装置や超音波画像診断装置等により検査するときなどの刺激装置として利用します。

【品目仕様等】 \*

1. 仕様

振動周波数：30～80Hz

振動の強さ（振動加速度）：100Gal以上

最大振動持続時間：約3秒（動作時間3秒モードの時）

間欠振動の回数：最小4回以下～最大8回以上 / 1回動作  
（動作時間3秒モードの時）

間欠動作の繰り返し周期：FAST～SLOW  
約0.3秒～約1.0秒

【操作方法または使用方法等】

1. 使用環境

温度10～40℃ 湿度30～75% 気圧70～106kPa

2. 使用前の準備

1) 電池セット

出荷時、乾電池及び電池ボックス蓋は外してあります。

- (1) 電池ボックス内に単3形アルカリ乾電池を2本入れてください。
- (2) 電池セット後、電池ボックス蓋を取り付けてください。

2) 分監への接続

- (1) 分娩監視装置記録紙上に本器動作記録を行う場合は、付属品リモートマーカ接続コードにより本器マーカジャックと分娩監視装置マーカジャック間を接続してください。

3. 操作方法

- ①モード切換スイッチにより、3秒モードと連続モードの選択をします。
- ②間欠振動調整ボリュームにより、振動の断続動作を調整します。
- ③加振部を妊婦の腹部に当てます。
- ④動作スイッチを押します。

取扱説明書を必ずご参照下さい。

## 〈使用方法上に関連する使用上の注意〉

本器の腹部への押し当ては、過度の圧迫とならないようにすること。

## 【使用上の注意】

### 1. 使用上の注意

モードの選択および間欠振動調整は医師の指示により決めてください。

### 2. 重要な基本的注意

- ①医師または医師の指示した者以外は機器を使用しないこと。
- ②機器の使用中は妊婦及び胎児に異常がないことを絶えず監視してください。  
妊婦及び胎児に異常が発見された場合には、機器の動作を止めるなど適切な措置を講じてください。

### 3. その他の注意

- ①水のかからないように使用してください。
- ②本器に超音波用ゲル・心電ペースト・オリーブ油等を付着させないでください。
- ③シンナーなどの有機溶剤による清拭は避けてください。〔ケースが溶けたり、変色したり、ラベルが剥がれたりします〕
- ④電池のセット時には電池極性を間違えないように入れてください。  
(電池ボックス内に電池極性が表示してあります)
- ⑤故障したときは勝手にいじらず適切な表示を行い、修理は専門家にまかせてください。
- ⑥機器は改造しないでください。

## 【貯蔵・保管方法及び使用期間等】

### 1. 貯蔵・保管方法

- ①保管環境 周囲温度：－4 0～＋7 0℃  
相対湿度：1 0～1 0 0 % (結露無しで)  
気圧：5 0～1 0 6 kPa
- ②保管場所については次の事項に注意してください。
  - I 水のかからない場所に保管すること。
  - II 気圧、温度、湿度、風通し、日光、ほこり、塩分、イオウ分などを含んだ空気などにより悪影響の生ずるおそれのない場所に保管すること。
  - III 傾斜、振動、衝撃(運搬時を含む)など安定状態に注意すること。
  - IV 化学薬品の保管場所やガスの発生する場所に保管しないこと。
- ③長期ご使用にならないときは、電池を外して保管してください。

### 2. 耐用年数

本器の耐用年数は6年です。〔自己認証(当社データ)による〕  
電池寿命(3秒間モード)：約7000回(アルカリ乾電池使用時)

## 【保守・点検に係わる事項】

### 1. 使用前点検

装置を使用する前に毎回、加振部に指を当てて動作スイッチを押し、振動することを確認してください。

### 2. 使用後の点検

動作時に振動しなくなったり、不規則な振動となった場合には電池を交換してください。

### 3. ケースの清拭について

汚れは柔らかい布で軽く拭き取ってください。汚れがひどいときは水で薄めた中性洗剤に浸した布をよく絞って拭き取り、乾いた布で仕上げてください。

## 【包装】

1 台単位で梱包

付属品：単3アルカリ乾電池 2本

リモートマーカ接続コード 1本

保証書 1部

取扱説明書 1冊

## 【製造販売業者及び製造業者の氏名又は名称及び住所等】\*

製造販売業者：トーイツ株式会社

住所：神奈川県横浜市港北区綱島東 5-10-3

TEL：045-543-1121

製造所の名称：トーイツ株式会社 綱島工場
